# Supplementary material for: Temporo-insular enhancement of EEG low and high frequencies in patients with chronic tinnitus. QEEG study of chronic tinnitus patients
Source: Springer Nature journal article supplement (doi:10.1186/1471-2202-11-40), 2010-03-24
Supplement: Additional file 1 [file 1471-2202-11-40-s1.pdf]

**Table S1.** Patient clinical details

| Patient | Age (years) | Sex  | Disease duration (years) | Side laterality (L,R,BL) | Tinnitus Localization | Tinnitus description (Tone/Noise) | Mean tinnitus intensity (VAS 0-100) | Tinnitus definition by masking | Hyperacusis | Hypoacusis (subjective) | Hearing loss             | Tinnitus Cause                         | Anxiety | Depression | Frustration | Reduction of QL |
|---------|-------------|------|--------------------------|--------------------------|-----------------------|-----------------------------------|-------------------------------------|--------------------------------|-------------|-------------------------|--------------------------|----------------------------------------|---------|------------|-------------|-----------------|
| 1       | 41          | male | 7                        | R                        | ear                   | noise                             | 50                                  | > 12 kHz                       | 0           | No                      | 40 db at 8 kHz           | emotional stress                       | 0       | 2          | 2           | 3               |
| 2       | 34          | male | 12                       | BL                       | ears                  | tone/noise                        | 42.5                                | NA                             | 0           | left 25% and Right 50%  | NA                       | otosclerosis                           | 1       | 1          | 2           | 2               |
| 3       | 50          | male | 2                        | R>L                      | ears and whole head   | tone/noise                        | 59                                  | 80 db                          | 2           | right 75%               | subtotal                 | petrous bone fracture                  | 2       | 1          | 2           | 3               |
| 4       | 63          | male | 20                       | L>R                      | ear and whole head    | noise                             | 77.5                                | 85 db at 5500 Hz               | 0           | left 25%                | 30 db at 500 Hz          | auditory trauma and head trauma        | 2       | 2          | 2           | 3               |
| 5       | 46          | male | 14                       | L>R                      | ears and whole head   | noise                             | 100                                 | NA                             | 0           | left 50%                | 15 db at 3 kHz           | ENT operation and auditory trauma      | 2       | 1          | 3           | 3               |
| 6       | 64          | male | 2                        | BL                       | ears and whole head   | tone/noise                        | 45                                  | 45 db at 6 kHz                 | 3           | No                      | normal hearing           | surgical stress                        | 3       | 3          | 0           | 3               |
| 7       | 70          | male | 10                       | L                        | ear                   | noise                             | 75                                  | 60 db at 8 kHz                 | 2           | left 25%                | 15 db at 8 kHz           | depression                             | 2       | 2          | 0           | 3               |
| 8       | 64          | male | 8                        | L                        | ear and left forehead | tone/noise                        | 54                                  | 40 db at 1500 Hz               | 0           | right 25% and left 100% | total deafness left side | Ménière and left VIII nerve neurectomy | 0       | 1          | 3           | 3               |
| median  | 56.5        |      | 9                        |                          |                       |                                   | 56.5                                |                                |             |                         |                          |                                        | 2       | 1.5        | 2           | 3               |
| mean    | 54.0        |      | 9.4                      |                          |                       |                                   | 62.9                                |                                |             |                         |                          |                                        | 1.5     | 1.6        | 1.8         | 2.9             |
